# Supplementary material
Source: publisher site journal article supplement (https://www.spandidos-publications.com/4290/downloadSupplementary)
Supplement: Supplementary file 1 [file downloadSupplementary]

## Sheet: Sheet1
Table SIV. Upregulated and downregulated genes in the DEK-knockdown AGS cells.
Upregulated genes (149)
Gene name	Gene number	logFC	logCPM	P-value	FDR	siCtrl_1st	siCtrl_2nd	siCtrl_3rd	siDEK_1st	siDEK_2nd	siDEK_3rd	Chr	Gene type	Description
ABLIM2	ENSG00000163995.18	0.62487	1.80199	0.000147873	0.0275264	0.51	0.55	0.47	0.87	0.85	0.68	chr4	protein_coding	actin binding LIM protein family, member 2
RSPH1	ENSG00000160188.9	0.646237	0.325739	0.00590766	0.276326	0.72	0.65	0.53	1.02	0.88	1.05	chr21	protein_coding	radial spoke head 1 homolog (Chlamydomonas)
LTBP2	ENSG00000119681.11	0.614186	1.46602	0.000536629	0.0675843	0.25	0.25	0.22	0.4	0.38	0.33	chr14	protein_coding	latent transforming growth factor beta binding protein 2
TTN	ENSG00000155657.23	1.39471	-1.48003	0.0020101	0.151919	0	0	0	0	0	0.01	chr2	protein_coding	titin
CCL3	ENSG00000277632.1	1.65215	-1.86844	0.000976191	0.101871	0.09	0.08	0.18	0.57	0.37	0.3	chr17	protein_coding	chemokine (C-C motif) ligand 3
C6orf15	ENSG00000204542.2	0.743562	1.60473	1.86125e-05	0.00538868	1.92	2.06	1.66	2.97	3.64	2.89	chr6	protein_coding	chromosome 6 open reading frame 15
PNMA3	ENSG00000183837.9	4.9742	-3.04452	0.00106569	0.106163	0	0	0	0.08	0.01	0.01	chrX	protein_coding	paraneoplastic Ma antigen 3
DNAH1	ENSG00000114841.17	1.06929	-0.728489	0.000381597	0.0523035	0.02	0.01	0.04	0.05	0.07	0.04	chr3	protein_coding	dynein, axonemal, heavy chain 1
RP4-597N16.4	ENSG00000273416.1	2.45528	-2.56757	0.00298212	0.187489	0	0.22	0	0.32	0.6	0.34	chr1	lincRNA	--
RP11-603J24.17	ENSG00000257553.1	1.52711	-1.73598	0.00181053	0.143628	0.24	0.3	0.26	0.55	0.82	1	chr12	antisense	--
SLC35F1	ENSG00000196376.10	4.84034	-3.10923	0.00209804	0.152765	0	0	0	0.03	0.03	0.01	chr6	protein_coding	solute carrier family 35, member F1
C9orf9	ENSG00000165698.15	0.735608	0.787836	0.00036547	0.05088	0.48	0.39	0.41	0.77	0.55	0.82	chr9	protein_coding	chromosome 9 open reading frame 9
WNK4	ENSG00000126562.16	1.74161	-1.12494	7.2905e-06	0.00264281	0.07	0.01	0.05	0.14	0.13	0.17	chr17	protein_coding	WNK lysine deficient protein kinase 4
RP11-69I8.2	ENSG00000236673.5	1.18542	-1.33475	0.00566539	0.27077	0.05	0.13	0.04	0.19	0.23	0.1	chr6	lincRNA	--
RP11-218E20.3	ENSG00000258711.2	1.70069	-2.07724	0.0017295	0.141229	0.01	0.01	0.02	0.09	0.03	0.04	chr14	lincRNA	--
NACAD	ENSG00000136274.8	0.960627	-0.919477	0.00944962	0.331218	0.07	0.09	0.04	0.15	0.09	0.13	chr7	protein_coding	NAC alpha domain containing
CCDC63	ENSG00000173093.12	4.69383	-3.17651	0.00413682	0.225682	0	0	0	0.07	0.06	0.01	chr12	protein_coding	coiled-coil domain containing 63
AC068134.10	ENSG00000251485.1	2.08151	-2.52469	0.00816843	0.309585	0	0.12	0.03	0.17	0.16	0.33	chr2	processed_pseudogene	--
ANKRD35	ENSG00000198483.12	0.64463	0.241915	0.00485638	0.245944	0.21	0.21	0.3	0.31	0.54	0.34	chr1	protein_coding	ankyrin repeat domain 35
RP11-54O7.17	ENSG00000272512.1	0.788114	2.38703	1.6608e-07	0.000117321	1.57	1.99	1.64	3.12	3.47	2.54	chr1	lincRNA	--
TRBV30	ENSG00000237254.2	2.47285	-2.86676	0.00807308	0.309585	0.08	0.07	0	0.61	0.29	0	chr7	TR_V_gene	T cell receptor beta variable 30 (gene/pseudogene)
CDH15	ENSG00000129910.7	0.974962	-0.114493	0.000125849	0.024285	0.14	0.16	0.26	0.29	0.42	0.46	chr16	protein_coding	cadherin 15, type 1, M-cadherin (myotubule)
AC007389.3	ENSG00000235725.1	1.49622	-1.95193	0.00651297	0.289233	0.06	0.08	0.04	0.27	0.12	0.14	chr2	lincRNA	--
RP11-244M2.1	ENSG00000267374.1	0.693541	-0.000592836	0.00612568	0.2802	0.23	0.31	0.34	0.46	0.49	0.51	chr18	lincRNA	--
NRIR	ENSG00000225964.5	3.25542	-2.92604	0.00373319	0.213824	0	0	0.02	0.21	0	0.18	chr2	antisense	negative regulator of interferon response (non-protein coding)
APBB1IP	ENSG00000077420.15	2.16528	-2.47978	0.00307645	0.190072	0.02	0.01	0.01	0.09	0.04	0.03	chr10	protein_coding	amyloid beta (A4) precursor protein-binding, family B, member 1 interacting protein
CTD-2545H1.2	ENSG00000262445.3	1.34535	-1.4386	0.0014219	0.128438	0.2	0.22	0.16	0.31	0.52	0.63	chr17	antisense	--
CD22	ENSG00000012124.14	0.598357	2.41671	5.36876e-05	0.0130893	0.99	1.31	1.32	1.95	1.87	1.79	chr19	protein_coding	CD22 molecule
CATSPERG	ENSG00000099338.22	1.12114	-1.21037	0.00419668	0.228044	0.08	0.03	0.07	0.15	0.14	0.11	chr19	protein_coding	catsper channel auxiliary subunit gamma
KIFC3	ENSG00000140859.15	0.637583	2.75956	7.55502e-06	0.00270313	0.77	1.2	1.06	1.62	1.6	1.59	chr16	protein_coding	kinesin family member C3
NOMO2	ENSG00000185164.14	0.617354	4.82318	5.03881e-07	0.000289207	5.11	1.54	4.24	2.89	8.05	5.84	chr16	protein_coding	NODAL modulator 2
NUTM2A	ENSG00000184923.12	2.44436	-2.10793	9.82377e-05	0.0205034	0.02	0	0.01	0.05	0.07	0.05	chr10	protein_coding	NUT family member 2A
AP000255.6	ENSG00000273091.1	4.53025	-3.24731	0.00816945	0.309585	0	0	0	0.05	0.29	0.04	chr21	lincRNA	--
LAMC3	ENSG00000050555.17	1.42051	-1.39784	0.000702235	0.0806107	0.02	0.03	0.03	0.07	0.09	0.06	chr9	protein_coding	laminin, gamma 3
CTB-12A17.3	ENSG00000269292.1	0.890059	-0.90081	0.00663385	0.291308	0.72	0.76	1.54	1.83	2.07	2.15	chr19	antisense	--
TMEM8B	ENSG00000137103.16	0.605304	1.87978	0.000157886	0.0284299	0.45	0.59	0.56	0.95	0.76	0.78	chr9	protein_coding	transmembrane protein 8B
RP11-1072A3.4	ENSG00000275263.1	1.84273	-2.28342	0.00702041	0.295379	0.22	0.1	0.21	1.14	0.2	0.71	chr16	lincRNA	--
NLGN3	ENSG00000196338.12	2.0863	-1.47783	8.11417e-06	0.00282969	0.05	0.02	0.01	0.1	0.1	0.15	chrX	protein_coding	neuroligin 3
OSBPL5	ENSG00000021762.19	1.04592	1.76939	8.13583e-10	7.00444e-07	0.53	0.54	0.36	1.1	0.98	0.86	chr11	protein_coding	oxysterol binding protein-like 5
ZBTB32	ENSG00000011590.13	0.657037	1.66557	0.00010874	0.0220278	1.01	1.29	1.05	1.87	1.76	1.72	chr19	protein_coding	zinc finger and BTB domain containing 32
VWCE	ENSG00000167992.12	0.870413	-0.535724	0.00291657	0.184716	0.09	0.1	0.13	0.21	0.25	0.18	chr11	protein_coding	von Willebrand factor C and EGF domains
CCL4	ENSG00000275302.1	1.1255	-1.37846	0.00659878	0.291171	0.16	0.21	0.25	0.68	0.43	0.35	chr17	protein_coding	chemokine (C-C motif) ligand 4
KRTAP2-3	ENSG00000212724.3	0.872225	-0.505063	0.00321185	0.194743	0.65	0.22	0.6	0.54	1.18	1.03	chr17	protein_coding	keratin associated protein 2-3
RP11-284F21.7	ENSG00000229953.1	1.50051	-0.981859	1.74212e-05	0.0052169	0.42	0.04	0.39	1.25	0.76	0.57	chr1	antisense	--
AATK	ENSG00000181409.11	0.755812	0.86265	0.000263119	0.0423915	0.33	0.23	0.17	0.45	0.36	0.4	chr17	protein_coding	apoptosis-associated tyrosine kinase
FP236383.4	ENSG00000275209.1	0.938746	1.45631	8.2035e-07	0.00044315	0.72	102.64	7.44	2.77	99.87	101.58	chr21	miRNA	--
LINC01269	ENSG00000258689.1	0.934171	-1.02583	0.0089395	0.324057	0.53	0.48	0.42	1.24	0.96	0.58	chr14	lincRNA	long intergenic non-protein coding RNA 1269
CTD-2561B21.8	ENSG00000280351.2	0.754667	-0.243612	0.00347066	0.205627	0.18	0.3	0.41	0.4	0.56	0.63	chr17	TEC	--
SLAMF9	ENSG00000162723.9	0.608136	1.13271	0.00134603	0.123611	1.43	1.42	1.34	2.02	2.26	2.18	chr1	protein_coding	SLAM family member 9
SLC4A5	ENSG00000188687.15	2.78533	-2.71116	0.00266295	0.173723	0.01	0	0	0.03	0.02	0.03	chr2	protein_coding	solute carrier family 4 (sodium bicarbonate cotransporter), member 5
KRTAP3-1	ENSG00000212901.3	0.624714	0.622465	0.0037776	0.215919	1.84	2.17	1.65	2.85	3.14	2.78	chr17	protein_coding	keratin associated protein 3-1
RP4-740C4.5	ENSG00000269896.2	1.38626	-0.88904	6.66475e-05	0.0154297	0.07	0.17	0.08	0.41	0.29	0.16	chr1	transcribed_processed_pseudogene	--
ITGA2B	ENSG00000005961.17	1.63791	-2.1088	0.00268279	0.173908	0	0.05	0.02	0.05	0.12	0.06	chr17	protein_coding	integrin, alpha 2b (platelet glycoprotein IIb of IIb/IIIa complex, antigen CD41)
MIR3615	ENSG00000264624.1	0.751627	-0.283337	0.0063541	0.284181	5.68	5.93	6.81	9.74	12.21	9.98	chr17	miRNA	microRNA 3615
RP1-90G24.11	ENSG00000273325.1	5.09245	-2.98467	0.000542146	0.0675843	0	0	0	0.08	0.36	0.39	chr22	lincRNA	--
RP11-968A15.2	ENSG00000257596.1	2.5816	-2.81583	0.00807308	0.309585	0	0.04	0.03	0.05	0.09	0.39	chr12	antisense	--
ALDH8A1	ENSG00000118514.13	2.33539	-2.17542	0.000267274	0.0425515	0	0.04	0.02	0.13	0.09	0.09	chr6	protein_coding	aldehyde dehydrogenase 8 family, member A1
AC006262.4	ENSG00000269729.1	1.44179	-1.78947	0.00390175	0.219713	0.08	0.11	0.19	0.16	0.53	0.44	chr19	lincRNA	--
RP11-982M15.2	ENSG00000258430.1	1.17521	-1.61275	0.00892817	0.324057	0.21	0.19	0.27	0.82	0.78	0.09	chr14	antisense	--
RFPL1	ENSG00000128250.5	1.51925	-1.84416	0.00300119	0.187489	0.02	0.04	0.12	0.18	0.17	0.27	chr22	protein_coding	ret finger protein-like 1
PRDM16	ENSG00000142611.16	1.09415	-1.3441	0.00484613	0.245877	0.01	0.01	0.04	0.05	0.04	0.06	chr1	protein_coding	PR domain containing 16
GATS	ENSG00000239521.7	0.59305	0.57426	0.00481843	0.245375	0.31	0.37	0.44	0.68	0.52	0.56	chr7	protein_coding	GATS, stromal antigen 3 opposite strand
AP001596.6	ENSG00000232692.1	1.69308	-2.20967	0.00963945	0.331747	0.05	0.05	0.01	0.08	0.12	0.12	chr21	antisense	--
LA16c-431H6.7	ENSG00000278987.1	2.02325	-2.36005	0.00113037	0.110042	0.02	0	0.04	0.19	0.04	0.07	chr16	TEC	--
ADAM11	ENSG00000073670.13	1.14605	-1.19146	0.00311277	0.190995	0.09	0.01	0.04	0.11	0.1	0.1	chr17	protein_coding	ADAM metallopeptidase domain 11
MT-ND6	ENSG00000198695.2	0.746145	6.30856	3.84542e-10	3.65315e-07	130.49	98.07	94.6	271.17	112.4	165.41	chrM	protein_coding	mitochondrially encoded NADH dehydrogenase 6
FLT3LG	ENSG00000090554.12	0.668147	0.42589	0.00301334	0.187738	0.49	0.58	0.62	0.96	0.89	0.9	chr19	protein_coding	fms-related tyrosine kinase 3 ligand
SPNS3	ENSG00000182557.7	0.929126	-0.25804	0.00051612	0.0655663	0.23	0.17	0.3	0.52	0.35	0.52	chr17	protein_coding	spinster homolog 3 (Drosophila)
ADAMTS16	ENSG00000145536.15	0.669718	0.157349	0.00640919	0.285717	0.15	0.13	0.13	0.24	0.23	0.18	chr5	protein_coding	ADAM metallopeptidase with thrombospondin type 1 motif, 16
FRY	ENSG00000073910.19	0.924701	-0.864435	0.00815357	0.309585	0.03	0.02	0.02	0.05	0.05	0.05	chr13	protein_coding	furry homolog (Drosophila)
NPIPA8	ENSG00000214940.8	5.40869	-2.81304	7.20346e-05	0.0160045	0	0	0	0	0.31	0	chr16	protein_coding	nuclear pore complex interacting protein family, member A8
RP11-284F21.10	ENSG00000272405.1	0.589227	1.9596	0.000276469	0.0425515	1.13	0.82	0.8	1.29	1.46	1.38	chr1	antisense	--
MGC32805	ENSG00000250328.5	0.608902	0.0709337	0.00955052	0.331442	0.29	0.42	0.56	0.83	0.58	0.63	chr5	antisense	--
SLC25A42	ENSG00000181035.13	0.697384	0.847666	0.000541749	0.0675843	0.35	0.52	0.36	0.51	0.88	0.61	chr19	protein_coding	solute carrier family 25, member 42
SV2A	ENSG00000159164.9	1.60448	-1.89625	0.00148244	0.131746	0.01	0.01	0.03	0.11	0.05	0.04	chr1	protein_coding	synaptic vesicle glycoprotein 2A
CIDEC	ENSG00000187288.10	0.789134	-0.522583	0.00685877	0.29296	0.33	0.26	0.36	0.64	0.77	0.32	chr3	protein_coding	cell death-inducing DFFA-like effector c
RP11-395B7.4	ENSG00000227053.1	4.69338	-3.17673	0.00413682	0.225682	0	0	0	0.33	0.24	0.14	chr7	antisense	--
RP4-635E18.7	ENSG00000226849.1	1.3903	-1.81121	0.00709621	0.295907	0.04	0.07	0.03	0.16	0.08	0.11	chr1	antisense	--
GAPDHP62	ENSG00000251013.1	1.24212	-1.50143	0.00396064	0.22133	0.11	0.23	0.16	0.55	0.29	0.38	chr8	processed_pseudogene	glyceraldehyde 3 phosphate dehydrogenase pseudogene 62
MCMDC2	ENSG00000178460.17	3.1322	-2.98396	0.0068247	0.292411	0	0.01	0	0.03	0	0.02	chr8	protein_coding	minichromosome maintenance domain containing 2
ABCC2	ENSG00000023839.10	1.69613	-1.54906	6.96833e-05	0.0156572	0.02	0.01	0.03	0.05	0.07	0.09	chr10	protein_coding	ATP-binding cassette, sub-family C (CFTR/MRP), member 2
RP4-616B8.4	ENSG00000261431.1	1.8071	-2.01593	0.00110876	0.108859	0.19	0.34	0.61	1.81	0.52	2.17	chr20	antisense	--
RP11-712L6.5	ENSG00000255062.1	1.01348	-1.13012	0.00362061	0.210652	0.35	0.25	0.76	0.8	1.27	0.97	chr11	antisense	--
TMEM44-AS1	ENSG00000231770.5	0.73559	1.07285	0.000151198	0.0279564	1.39	1.44	1.14	2.39	1.93	2.3	chr3	antisense	TMEM44 antisense RNA 1
AP000347.2	ENSG00000272578.5	0.846919	-0.737224	0.00931818	0.329848	0.05	0.07	0.07	0.08	0.14	0.12	chr22	transcribed_unprocessed_pseudogene	--
CEACAMP9	ENSG00000230529.1	1.69488	-1.54995	0.000106148	0.021662	0.07	0.19	0.4	0.46	0.75	1.18	chr19	unprocessed_pseudogene	carcinoembryonic antigen-related cell adhesion molecule pseudogene 9
DBN1	ENSG00000113758.13	1.15437	0.0290854	1.38971e-05	0.00430185	0.17	0.16	0.08	0.36	0.25	0.25	chr5	protein_coding	drebrin 1
CXCL10	ENSG00000169245.5	0.897239	0.622062	1.86446e-05	0.00538868	0.57	0.85	1.03	2.31	1.15	1.35	chr4	protein_coding	chemokine (C-X-C motif) ligand 10
RP11-284F21.9	ENSG00000272068.1	0.853204	-0.47692	0.0038582	0.219713	0.15	0.15	0.12	0.33	0.2	0.24	chr1	lincRNA	--
TGM4	ENSG00000163810.11	1.94944	-2.40219	0.00307645	0.190072	0	0	0.03	0.04	0.06	0.08	chr3	protein_coding	transglutaminase 4
DNASE1L2	ENSG00000167968.12	0.836565	-0.543359	0.00851189	0.316895	0.13	0.31	0.16	0.34	0.29	0.42	chr16	protein_coding	deoxyribonuclease I-like 2
WBSCR28	ENSG00000175877.3	1.17255	-1.61419	0.00892817	0.324057	0.12	0.19	0.21	0.56	0.45	0.27	chr7	protein_coding	Williams-Beuren syndrome chromosome region 28
RP3-467D16.3	ENSG00000282024.1	0.640283	2.59183	1.02746e-05	0.00341042	3.37	1.7	2.95	4.9	3.48	4.29	chr6	antisense	--
FES	ENSG00000182511.11	0.870525	-0.867898	0.00815357	0.309585	0.1	0.1	0.14	0.26	0.25	0.14	chr15	protein_coding	FES proto-oncogene, tyrosine kinase
TXNDC5	ENSG00000239264.8	0.791409	0.199854	0.000766771	0.085269	0.27	0.15	0.28	0.45	0.44	0.36	chr6	protein_coding	thioredoxin domain containing 5 (endoplasmic reticulum)
RP11-791G15.2	ENSG00000272275.1	1.69614	-2.21175	0.00963945	0.331747	0.27	0.08	0.17	0.35	0.66	0.74	chr2	lincRNA	--
SLC26A5	ENSG00000170615.14	2.6864	-2.43891	0.000605845	0.0716354	0.02	0	0.01	0.06	0.09	0.07	chr7	protein_coding	solute carrier family 26 (anion exchanger), member 5
RP11-396O20.1	ENSG00000254695.1	4.52818	-3.24831	0.00816945	0.309585	0	0	0	0.14	0	0.37	chr11	lincRNA	--
FLJ16779	ENSG00000275620.1	0.836987	-0.667886	0.0095758	0.331442	0.06	0.05	0.04	0.12	0.11	0.05	chr20	antisense	--
RP3-510D11.2	ENSG00000234546.2	0.722287	0.0543837	0.00545405	0.266417	0.61	1.08	0.51	1.27	1.18	1.15	chr1	lincRNA	--
CTD-2540B15.7	ENSG00000267727.1	1.75552	-2.04766	0.0017295	0.141229	0.15	0	0.28	0.21	0.87	0.6	chr19	antisense	--
ANKLE1	ENSG00000160117.14	0.881978	-0.556548	0.00263945	0.173723	0.1	0.14	0.14	0.31	0.21	0.22	chr19	protein_coding	ankyrin repeat and LEM domain containing 1
EMILIN1	ENSG00000138080.13	0.820828	-0.501365	0.00598852	0.277284	0.08	0.14	0.12	0.27	0.14	0.21	chr2	protein_coding	elastin microfibril interfacer 1
CACNA1G	ENSG00000006283.17	4.69215	-3.17732	0.00413682	0.225682	0	0	0	0.01	0.01	0.01	chr17	protein_coding	calcium channel, voltage-dependent, T type, alpha 1G subunit
FP671120.6	ENSG00000278047.1	3.25908	-2.92427	0.00203478	0.151919	0	0	0.25	4.42	0	0	chr21	miRNA	--
KCNJ13	ENSG00000115474.6	2.37179	-2.61415	0.00501842	0.250146	0.01	0.01	0.01	0.08	0.04	0.05	chr2	protein_coding	potassium channel, inwardly rectifying subfamily J, member 13
BATF2	ENSG00000168062.9	0.973771	-0.993285	0.00992664	0.336383	0.2	0.14	0.06	0.19	0.25	0.28	chr11	protein_coding	basic leucine zipper transcription factor, ATF-like 2
OPRL1	ENSG00000125510.15	0.604197	1.47081	0.000710996	0.0812778	0.63	0.63	0.5	0.97	0.93	0.78	chr20	protein_coding	opiate receptor-like 1
MT-TS1	ENSG00000210151.2	0.925334	0.705558	6.22387e-06	0.00228624	13.81	11.68	18.49	31.45	24.73	30.62	chrM	Mt_tRNA	mitochondrially encoded tRNA serine 1 (UCN)
HTRA3	ENSG00000170801.9	0.616221	0.874214	0.00264241	0.173723	0.47	0.4	0.36	0.7	0.61	0.57	chr4	protein_coding	HtrA serine peptidase 3
TNFRSF10C	ENSG00000173535.13	0.719183	-0.255175	0.00881823	0.323632	0.23	0.2	0.25	0.32	0.53	0.29	chr8	protein_coding	tumor necrosis factor receptor superfamily, member 10c, decoy without an intracellular domain
CTB-186G2.1	ENSG00000267291.1	1.90851	-2.24868	0.00188022	0.144929	0.14	0	0.18	0.2	0.56	0.56	chr19	antisense	--
C1orf167	ENSG00000215910.7	1.28709	-0.907505	0.000291626	0.0434286	0.06	0.06	0.06	0.19	0.1	0.14	chr1	protein_coding	chromosome 1 open reading frame 167
AC016739.2	ENSG00000218175.2	0.89868	-0.0585475	0.00047261	0.0621888	1.23	2.15	1.78	2.95	4.01	2.94	chr2	processed_pseudogene	--
JAG2	ENSG00000184916.8	0.629217	1.31097	0.000548907	0.0681188	0.33	0.33	0.28	0.58	0.54	0.35	chr14	protein_coding	jagged 2
RP11-104H15.7	ENSG00000262880.1	1.00358	-0.651784	0.000896965	0.0961532	0.11	0.18	0.24	0.36	0.44	0.34	chr17	processed_transcript	--
AMH	ENSG00000104899.5	0.727427	0.813172	0.000287405	0.0432678	0.48	0.71	0.78	1.08	1.17	1.13	chr19	protein_coding	anti-Mullerian hormone
CCDC80	ENSG00000091986.15	0.61664	3.3104	5.27912e-06	0.00202675	0.58	0.62	0.58	0.95	0.91	0.91	chr3	protein_coding	coiled-coil domain containing 80
RP11-314N13.3	ENSG00000229728.1	2.28297	-2.66247	0.00838987	0.313624	0	0.07	0.09	0.42	0.34	0.24	chr20	antisense	--
RP1-206D15.6	ENSG00000213062.4	2.58551	-2.81394	0.00807308	0.309585	0	0.04	0.03	0.22	0.14	0.1	chr1	lincRNA	--
HMOX1	ENSG00000100292.16	0.721689	8.18063	7.54205e-10	6.7027e-07	107.45	121.92	113.67	196.51	199.07	178.69	chr22	protein_coding	heme oxygenase 1
MATN1	ENSG00000162510.5	0.740985	-0.236901	0.00777412	0.309504	0.19	0.11	0.14	0.15	0.31	0.28	chr1	protein_coding	matrilin 1, cartilage matrix protein
ISYNA1	ENSG00000105655.18	0.974433	0.197135	6.62225e-05	0.0154297	0.3	0.27	0.24	0.43	0.58	0.58	chr19	protein_coding	inositol-3-phosphate synthase 1
RP13-516M14.8	ENSG00000280407.2	1.91172	-1.9524	0.000283646	0.0430385	0.01	0.04	0.03	0.11	0.2	0.03	chr17	TEC	--
WNT8B	ENSG00000075290.7	2.08533	-1.83978	0.00017873	0.0317985	0.1	0	0.02	0.1	0.14	0.25	chr10	protein_coding	wingless-type MMTV integration site family, member 8B
RP11-351I24.1	ENSG00000254554.1	3.13573	-2.98408	0.0068247	0.292411	0	0	0.03	0.34	0.04	0.07	chr11	antisense	--
ASIC3	ENSG00000213199.7	2.03035	-2.17726	0.000715668	0.0813873	0.02	0.03	0.03	0.06	0.13	0.14	chr7	protein_coding	acid sensing (proton gated) ion channel 3
RP13-554M15.7	ENSG00000280287.1	0.683789	1.83892	2.32794e-05	0.00641348	0.36	0.78	0.66	0.86	1.03	1.08	chr12	TEC	--
AURKAPS1	ENSG00000213033.4	1.12233	-1.3799	0.00659878	0.291171	0.15	0.13	0.19	0.39	0.27	0.41	chr1	transcribed_processed_pseudogene	aurora kinase A pseudogene 1
RP11-599J14.2	ENSG00000256673.1	2.18656	-2.71297	0.00464986	0.240796	0	0	0.17	0.42	0.24	0.43	chr12	unprocessed_pseudogene	--
RASA4CP	ENSG00000228903.6	1.78429	-1.78729	0.000270966	0.0425515	0.02	0.02	0.03	0.08	0.1	0.09	chr7	transcribed_unprocessed_pseudogene	RAS p21 protein activator 4C, pseudogene
RP5-968D22.1	ENSG00000228697.1	4.83973	-3.10952	0.00209804	0.152765	0	0	0	0.06	0.09	0.03	chr1	lincRNA	--
ACTA2	ENSG00000107796.12	0.683533	3.48252	3.49485e-07	0.000209311	5.15	4.49	3.97	6.99	7.53	7.52	chr10	protein_coding	actin, alpha 2, smooth muscle, aorta
ENDOV	ENSG00000173818.16	0.645291	2.99056	3.89402e-06	0.00165101	1.23	1.43	1.31	2.07	2.06	2.15	chr17	protein_coding	endonuclease V
HIPK4	ENSG00000160396.8	3.47071	-2.81528	0.00110581	0.108859	0	0	0.01	0.01	0.08	0.08	chr19	protein_coding	homeodomain interacting protein kinase 4
CTB-52I2.4	ENSG00000273654.1	1.98809	-1.66006	2.95951e-05	0.00783986	0.04	0.06	0.07	0.25	0.3	0.15	chr19	transcribed_processed_pseudogene	--
GPR3	ENSG00000181773.6	0.907188	0.16713	0.000152778	0.0280369	0.37	0.27	0.36	0.61	0.59	0.7	chr1	protein_coding	G protein-coupled receptor 3
PREX1	ENSG00000124126.13	0.823004	-0.503292	0.00441388	0.234753	0.05	0.07	0.08	0.11	0.13	0.12	chr20	protein_coding	phosphatidylinositol-3,4,5-trisphosphate-dependent Rac exchange factor 1
HDAC9	ENSG00000048052.21	2.01384	-2.35896	0.0048285	0.245434	0.01	0	0	0.01	0.02	0.02	chr7	protein_coding	histone deacetylase 9
RP11-522B15.3	ENSG00000259275.2	1.55559	-1.92806	0.00223944	0.157627	0.01	0.01	0.04	0.05	0.07	0.06	chr15	lincRNA	--
SPRR2A	ENSG00000241794.1	0.63019	0.235768	0.00861777	0.319542	1.19	1.32	1.06	1.63	1.95	1.96	chr1	protein_coding	small proline-rich protein 2A
AP000318.2	ENSG00000214955.5	4.52846	-3.24818	0.00816945	0.309585	0	0	0	0.04	0.08	0.18	chr21	lincRNA	--
KIF17	ENSG00000117245.12	1.16196	0.231571	9.10499e-07	0.000482389	0.18	0.13	0.17	0.47	0.31	0.32	chr1	protein_coding	kinesin family member 17
CH17-360D5.3	ENSG00000273760.1	0.854383	-0.461557	0.00308393	0.190072	0.38	0.51	0.69	1.4	0.74	0.91	chr10	lincRNA	--
MYH3	ENSG00000109063.14	0.968935	-0.734442	0.00224282	0.157627	0.05	0.06	0.06	0.13	0.11	0.11	chr17	protein_coding	myosin, heavy chain 3, skeletal muscle, embryonic
RP11-640L9.2	ENSG00000281100.1	2.68987	-2.7611	0.00464986	0.240796	0.02	0	0.01	0.08	0.11	0.03	chr3	TEC	--
NBPF25P	ENSG00000272150.5	0.678035	0.232927	0.00570619	0.271982	0.19	0.27	0.18	0.27	0.23	0.53	chr1	transcribed_unprocessed_pseudogene	neuroblastoma breakpoint family, member 25, pseudogene
MMP19	ENSG00000123342.15	0.769857	-0.304797	0.00773496	0.309111	0.34	0.2	0.15	0.32	0.42	0.42	chr12	protein_coding	matrix metallopeptidase 19
ABHD16B	ENSG00000183260.6	3.57111	-2.7611	0.000599517	0.0716354	0	0	0.01	0.11	0.09	0.03	chr20	protein_coding	abhydrolase domain containing 16B
Downregulated genes (229)
Gene name	Gene number	logFC	logCPM	P-Value	FDR	siCtrl_1st	siCtrl_2nd	siCtrl_3rd	siDEK_1st	siDEK_2nd	siDEK_3rd	Chr	GeneType	Description
HIST1H3C	ENSG00000278272.1	-1.03006	-0.413034	0.000365671	0.05088	1.72	2.67	2	1.24	0.94	0.99	chr6	protein_coding	histone cluster 1, H3c
RN7SK	ENSG00000202198.1	-2.12668	4.82289	6.47873e-62	8.92445e-58	122.3	113.67	159.47	44.67	20.04	27.54	chr6	misc_RNA	RNA, 7SK small nuclear
RP11-423H2.1	ENSG00000170089.15	-1.32197	-1.08389	0.000657783	0.0764637	0.16	0.42	0.34	0.08	0.2	0.1	chr5	transcribed_unprocessed_pseudogene	--
RP11-252K23.2	ENSG00000261783.1	-1.34085	-1.19799	0.000492731	0.0637312	0.94	1.9	1.22	0.27	0.52	0.77	chr16	sense_intronic	--
Metazoa_SRP	ENSG00000274012.1	-1.6837	4.17403	2.1596e-37	8.49957e-34	85.41	72.33	102.67	37.98	20.07	24.5	chr14	misc_RNA	--
ROCK1P1	ENSG00000263006.6	-1.61668	-0.574255	2.52585e-07	0.000161831	0.55	0.21	0.32	0.06	0.1	0.18	chr18	transcribed_unprocessed_pseudogene	Rho-associated, coiled-coil containing protein kinase 1 pseudogene 1
HIST2H2BF	ENSG00000203814.6	-2.04354	0.160793	2.07736e-14	3.17952e-11	0.57	0.67	0.64	0.2	0.14	0.13	chr1	protein_coding	histone cluster 2, H2bf
HIST2H3D	ENSG00000183598.3	-1.73074	-1.14902	2.30642e-05	0.00641348	0.77	1.8	1.44	0.74	0.31	0.21	chr1	protein_coding	histone cluster 2, H3d
RP11-504P24.3	ENSG00000185495.10	-0.780063	0.98524	8.53068e-05	0.0182186	0.98	0.78	0.88	0.75	0.5	0.32	chr1	transcribed_unprocessed_pseudogene	--
ZC4H2	ENSG00000126970.15	-1.03633	-0.812221	0.00263033	0.173723	0.17	0.15	0.27	0.14	0.07	0.09	chrX	protein_coding	zinc finger, C4H2 domain containing
HIST1H3I	ENSG00000275379.1	-2.81812	-0.928798	2.10896e-11	2.52616e-08	1.37	1.33	2.55	0.41	0.23	0.14	chr6	protein_coding	histone cluster 1, H3i
HIST1H2AE	ENSG00000277075.1	-1.09569	0.115716	1.30273e-05	0.0041253	2.69	3.77	3.48	1.98	1.31	1.47	chr6	protein_coding	histone cluster 1, H2ae
RP11-152N13.16	ENSG00000272599.2	-0.587386	0.478219	0.00864896	0.320267	1.95	1.82	1.72	1.3	1.24	1.15	chr10	antisense	--
SNORD13	ENSG00000239039.1	-2.27187	-2.57192	0.00501842	0.250146	2.04	1.24	1.53	0.33	0	0.56	chr8	snoRNA	small nucleolar RNA, C/D box 13
LAT2	ENSG00000086730.16	-0.620834	1.12941	0.000767576	0.085269	0.65	0.68	0.48	0.45	0.34	0.38	chr7	protein_coding	linker for activation of T cells family, member 2
AC010970.2	ENSG00000225840.2	-0.850759	1.42991	3.8953e-06	0.00165101	1.2	1.05	2.75	0.99	0.91	1.02	chrY	processed_pseudogene	--
RP11-968O1.5	ENSG00000256139.2	-3.08413	-2.92882	0.0068247	0.292411	0.16	0.07	0.15	0	0	0.03	chr12	sense_overlapping	--
SPOPL	ENSG00000144228.8	-0.612135	3.05645	9.98356e-06	0.0033629	1.75	1.23	1.75	1.01	0.89	1.23	chr2	protein_coding	speckle-type POZ protein-like
RP11-66A2.2	ENSG00000236497.1	-4.59254	-3.1814	0.00816945	0.309585	0	0.05	0.07	0	0	0	chr1	lincRNA	--
CTD-2260A17.2	ENSG00000247121.6	-0.845289	-0.00212255	0.000767106	0.085269	0.61	0.47	0.46	0.3	0.19	0.36	chr5	antisense	--
RPSAP9	ENSG00000234618.1	-0.943623	-0.601369	0.00272805	0.175602	0.72	0.76	0.97	0.38	0.44	0.49	chr9	processed_pseudogene	ribosomal protein SA pseudogene 9
HIST1H4J	ENSG00000197238.4	-0.990059	0.821928	1.37894e-06	0.000678391	4.73	7.17	5.37	3.36	2.5	2.95	chr6	protein_coding	histone cluster 1, H4j
AC093627.10	ENSG00000240859.1	-1.82646	-2.36342	0.00766096	0.308104	0.03	0.05	0.04	0.01	0	0.02	chr7	lincRNA	--
HIST1H3D	ENSG00000197409.7	-1.44523	-0.837411	4.80239e-05	0.0119194	1.89	1.1	1.94	0.5	0.63	0.7	chr6	protein_coding	histone cluster 1, H3d
RP11-390P2.4	ENSG00000225177.5	-0.872343	1.61975	3.91307e-07	0.000229373	4.2	4.08	3.85	2.44	2.25	2.02	chr6	antisense	--
INTS6-AS1	ENSG00000236778.7	-0.765422	-0.367253	0.00713698	0.297015	0.37	0.35	0.42	0.21	0.23	0.24	chr13	antisense	INTS6 antisense RNA 1
RNU4-2	ENSG00000202538.1	-2.49637	0.624753	9.38063e-25	2.34942e-21	15.02	15.32	19.23	3.37	1.83	3.69	chr12	snRNA	RNA, U4 small nuclear 2
ANKRD22	ENSG00000152766.5	-2.18476	-2.61741	0.00838987	0.313624	0.15	0.04	0.1	0.04	0.02	0	chr10	protein_coding	ankyrin repeat domain 22
RNU6ATAC	ENSG00000221676.1	-2.4044	-2.81636	0.00807308	0.309585	1.4	0.77	0.9	0	0.26	0.23	chr9	snRNA	RNA, U6atac small nuclear (U12-dependent splicing)
HIST1H2AI	ENSG00000196747.4	-1.40559	-1.15206	0.000437325	0.0579245	0.63	1.09	1.31	0.67	0.26	0.29	chr6	protein_coding	histone cluster 1, H2ai
SCARNA21	ENSG00000252835.1	-3.29886	-2.81818	0.00203478	0.151919	0.25	1.39	1.15	0	0.23	0	chr17	scaRNA	small Cajal body-specific RNA 21
HIST1H3J	ENSG00000197153.4	-2.01438	-1.76867	0.000270966	0.0425515	0.86	0.55	1.05	0.41	0.16	0.07	chr6	protein_coding	histone cluster 1, H3j
RMRP	ENSG00000269900.3	-2.11677	4.36992	3.34771e-57	3.07432e-53	108.39	103.46	143.75	37.08	14.9	31.31	chr9	lincRNA	RNA component of mitochondrial RNA processing endoribonuclease
RNU12	ENSG00000276027.1	-3.01658	-2.11984	1.29543e-05	0.0041253	1.65	0.64	2.89	0.23	0.21	0.19	chr22	snRNA	RNA, U12 small nuclear
PSPH	ENSG00000146733.13	-0.616361	5.92556	2.60285e-07	0.000162974	36.9	28.72	30.98	25.6	19.58	18.63	chr7	protein_coding	phosphoserine phosphatase
AC026271.5	ENSG00000174977.8	-5.30507	-2.81971	0.000140953	0.0264167	0.1	0.05	0.15	0	0	0	chr17	processed_pseudogene	--
AC104389.28	ENSG00000167355.7	-5.00267	-2.9839	0.000542146	0.0675843	0.15	0.14	0.04	0	0	0	chr11	processed_transcript	--
TSGA10	ENSG00000135951.14	-0.698012	-0.0831294	0.00825528	0.311126	0.2	0.27	0.27	0.22	0.15	0.1	chr2	protein_coding	testis specific, 10
RN7SL1	ENSG00000276168.1	-1.84578	5.15646	5.01456e-49	2.30252e-45	176.94	152.79	202.07	65.44	42.53	42.39	chr14	misc_RNA	RNA, 7SL, cytoplasmic 1
FGF21	ENSG00000105550.8	-1.12863	-0.513088	0.000359628	0.0506928	0.62	0.42	0.8	0.62	0.25	0.04	chr19	protein_coding	fibroblast growth factor 21
HIST1H2BF	ENSG00000277224.1	-1.34429	-1.01372	0.000220869	0.0375614	2.13	1.52	1.14	0.62	0.59	0.61	chr6	protein_coding	histone cluster 1, H2bf
KYNU	ENSG00000115919.14	-2.40353	-2.81635	0.00807308	0.309585	0	0.01	0.01	0	0	0	chr2	protein_coding	kynureninase
HIST1H2AG	ENSG00000196787.3	-0.951441	0.436214	2.67716e-05	0.00720612	0.66	0.69	0.78	0.27	0.52	0.33	chr6	protein_coding	histone cluster 1, H2ag
RP11-707G18.1	ENSG00000278743.1	-1.2974	-1.76133	0.00494426	0.249691	0.43	0.9	0.36	0.12	0.34	0.2	chr12	lincRNA	--
RP11-447D11.3	ENSG00000280173.1	-1.79989	-2.04615	0.0017295	0.141229	0.22	0.08	0.1	0.03	0.06	0.01	chr3	TEC	--
HIST1H4H	ENSG00000158406.3	-1.15271	-0.872429	0.00100207	0.102918	1.33	1.79	1.61	1.28	0.65	0.29	chr6	protein_coding	histone cluster 1, H4h
HNRNPCP1	ENSG00000258900.1	-0.60868	0.447088	0.00764319	0.308104	1.47	2.36	1.96	1.37	1.22	1.28	chr14	processed_pseudogene	heterogeneous nuclear ribonucleoprotein C pseudogene 1
CTD-2553L13.10	ENSG00000274104.1	-0.599936	0.934434	0.00221657	0.157627	4.44	4.18	3.29	3.27	2.38	2.25	chr19	lincRNA	--
RP11-798G7.6	ENSG00000267198.1	-0.813507	0.206417	0.000923919	0.0978999	0.53	0.61	0.74	0.38	0.36	0.36	chr17	lincRNA	--
RP11-342K2.1	ENSG00000279133.1	-0.680571	0.0670729	0.00767186	0.308104	0.33	0.24	0.32	0.2	0.15	0.21	chr17	TEC	--
RP11-228M15.1	ENSG00000274471.1	-2.60443	-2.7133	0.00266295	0.173723	0.24	0.11	0.15	0.04	0.04	0	chr15	unprocessed_pseudogene	--
HIST1H1D	ENSG00000124575.6	-2.3825	-1.38475	5.17663e-07	0.000291053	1.06	0.44	0.79	0.25	0.15	0.04	chr6	protein_coding	histone cluster 1, H1d
USH1G	ENSG00000182040.8	-0.715459	0.113822	0.00515144	0.254341	0.26	0.33	0.4	0.3	0.21	0.13	chr17	protein_coding	Usher syndrome 1G (autosomal recessive)
APOA4	ENSG00000110244.6	-2.79093	-2.61263	0.000861149	0.0939977	0.34	0.02	0.03	0	0.02	0.02	chr11	protein_coding	apolipoprotein A-IV
FUT3	ENSG00000171124.12	-0.622401	0.601715	0.00397618	0.221748	0.63	0.72	0.6	0.54	0.56	0.2	chr19	protein_coding	fucosyltransferase 3 (galactoside 3(4)-L-fucosyltransferase, Lewis blood group)
HOXB7	ENSG00000260027.4	-0.629564	0.257439	0.00774179	0.309111	1.26	0.78	0.86	0.89	0.42	0.57	chr17	protein_coding	homeobox B7
HIST1H4E	ENSG00000276966.1	-1.49814	-0.554493	4.32826e-06	0.00177975	1.92	1.96	3.94	1.41	0.72	0.83	chr6	protein_coding	histone cluster 1, H4e
RP11-422P24.12	ENSG00000282386.1	-0.650659	0.594435	0.00167064	0.140324	2.73	2.68	1.83	1.24	1.68	1.63	chr1	antisense	--
CTD-3193O13.12	ENSG00000214248.2	-1.43354	-1.34289	0.000885481	0.095293	0.09	0.11	0.09	0.06	0.03	0.01	chr19	antisense	--
RP11-255C15.3	ENSG00000260743.1	-4.43334	-3.24999	0.00816945	0.309585	0.07	0.02	0.06	0	0	0	chr3	lincRNA	--
RLN2	ENSG00000107014.8	-0.82543	-0.227126	0.00347066	0.205627	0.9	0.41	1.06	0.43	0.3	0.64	chr9	protein_coding	relaxin 2
RP11-680H20.1	ENSG00000256745.1	-4.44104	-3.24604	0.00816945	0.309585	0.39	0.12	0	0	0	0	chr11	processed_pseudogene	--
RP11-147L13.15	ENSG00000274712.1	-0.728606	0.0781668	0.00361652	0.210652	0.74	0.45	0.58	0.39	0.39	0.3	chr17	lincRNA	--
CHAC1	ENSG00000128965.11	-0.757394	7.35724	1.32106e-10	1.34797e-07	94.07	101.59	90.05	71.98	56.82	43.03	chr15	protein_coding	ChaC glutathione-specific gamma-glutamylcyclotransferase 1
HIST4H4	ENSG00000197837.3	-1.30484	-1.42396	0.00342871	0.204461	0.49	0.89	0.75	0.41	0.22	0.25	chr12	protein_coding	histone cluster 4, H4
HCG27	ENSG00000206344.6	-0.853959	0.152839	0.000557741	0.0686102	0.6	0.73	0.86	0.43	0.36	0.45	chr6	protein_coding	HLA complex group 27 (non-protein coding)
GAS2L3	ENSG00000139354.10	-0.928276	-0.968321	0.00769451	0.308402	0.23	0.2	0.13	0.11	0.05	0.12	chr12	protein_coding	growth arrest-specific 2 like 3
HIST1H2AH	ENSG00000274997.1	-1.94918	-1.25433	2.30381e-06	0.00103294	1.19	1.42	1.47	0.26	0.42	0.37	chr6	protein_coding	histone cluster 1, H2ah
SNORA73B	ENSG00000200087.1	-1.61411	0.501959	8.00369e-12	1.05001e-08	8.65	5.22	13.4	3.16	3.79	2.41	chr1	snoRNA	small nucleolar RNA, H/ACA box 73B
LINC01355	ENSG00000261326.2	-0.747998	0.456308	0.00109381	0.108398	0.26	0.25	0.33	0.17	0.18	0.16	chr1	lincRNA	long intergenic non-protein coding RNA 1355
AP1AR	ENSG00000138660.11	-0.624306	2.07429	7.35905e-05	0.0162193	1.95	1.21	1.79	1.03	0.89	1.32	chr4	protein_coding	adaptor-related protein complex 1 associated regulatory protein
SLC7A11	ENSG00000151012.13	-0.889351	4.22045	2.83433e-12	3.90429e-09	2.84	2.04	2.29	1.79	1.08	1.05	chr4	protein_coding	solute carrier family 7 (anionic amino acid transporter light chain, xc- system), member 11
TARID	ENSG00000227954.6	-4.58893	-3.18326	0.00816945	0.309585	0	0	0.03	0	0	0	chr6	antisense	TCF21 antisense RNA inducing promoter demethylation
RP1-199J3.5	ENSG00000219755.1	-1.33058	-1.74157	0.00709621	0.295907	0.43	0.35	0.49	0.18	0.13	0.19	chr6	processed_pseudogene	--
MYO16	ENSG00000041515.15	-2.05107	-2.44376	0.00503017	0.250146	0.03	0.02	0.03	0	0	0.01	chr13	protein_coding	myosin XVI
IL1R1	ENSG00000115594.11	-0.601245	0.672159	0.00391435	0.219713	0.32	0.3	0.23	0.2	0.18	0.17	chr2	protein_coding	interleukin 1 receptor, type I
IBA57-AS1	ENSG00000203684.5	-1.83811	-2.02272	0.0017295	0.141229	0.3	0.33	0.65	0.11	0.16	0.1	chr1	lincRNA	IBA57 antisense RNA 1 (head to head)
U1	ENSG00000270722.1	-2.89062	0.818211	5.96973e-32	2.05583e-28	12.27	16.51	21.39	4.14	1.77	1.24	chr1	snRNA	--
HIST1H4L	ENSG00000275126.1	-1.38961	-1.53283	0.00183586	0.144097	0.9	1.24	1.46	0.22	0.1	1.02	chr6	protein_coding	histone cluster 1, H4l
CREB3L3	ENSG00000060566.13	-0.96669	-0.900159	0.00512887	0.254137	0.28	0.18	0.22	0.13	0.09	0.13	chr19	protein_coding	cAMP responsive element binding protein 3-like 3
PCMTD1	ENSG00000168300.13	-0.624391	2.63963	1.627e-05	0.0049257	1.62	1.08	1.22	0.88	0.79	0.88	chr8	protein_coding	protein-L-isoaspartate (D-aspartate) O-methyltransferase domain containing 1
RP11-306G20.1	ENSG00000244036.3	-1.88816	-2.32789	0.00766096	0.308104	0.07	0.11	0.2	0	0.11	0	chr7	antisense	--
RNY1	ENSG00000201098.1	-1.83291	-0.621958	6.50566e-08	4.84408e-05	6.25	5.14	10.48	2.4	1.42	2.56	chr7	misc_RNA	RNA, Ro-associated Y1
SCN4A	ENSG00000007314.11	-1.89805	-2.1455	0.00182512	0.143737	0.04	0.02	0.03	0.01	0.01	0.01	chr17	protein_coding	sodium channel, voltage gated, type IV alpha subunit
SH2B3	ENSG00000111252.10	-0.832102	4.90505	1.49872e-11	1.87681e-08	7.7	6.08	5.92	4.72	3.53	2.96	chr12	protein_coding	SH2B adaptor protein 3
RP1-20C7.6	ENSG00000272223.1	-2.50521	-2.7656	0.00807308	0.309585	0.21	0.25	0.31	0	0.06	0.06	chr6	antisense	--
ERRFI1	ENSG00000116285.12	-0.785906	7.10781	2.8973e-11	3.19282e-08	48.52	31.61	39.9	27.89	21.96	20.53	chr1	protein_coding	ERBB receptor feedback inhibitor 1
PRORSD1P	ENSG00000162997.15	-1.57416	-1.04558	2.69412e-05	0.00720612	1.37	1.19	0.84	0.56	0.18	0.37	chr2	unitary_pseudogene	prolyl-tRNA synthetase associated domain containing 1, pseudogene
SCARNA10	ENSG00000239002.3	-2.84061	-1.72175	3.30043e-07	0.00020206	1.07	0.78	1.59	0	0.1	0.35	chr12	snoRNA	small Cajal body-specific RNA 10
LINC01300	ENSG00000253595.5	-0.689659	0.152624	0.00435217	0.23356	1.77	1.9	1.09	1.07	1.29	0.58	chr8	antisense	long intergenic non-protein coding RNA 1300
HIST1H2AJ	ENSG00000276368.1	-1.52248	-0.953618	4.584e-05	0.0115862	0.82	1.67	2.18	0.61	0.33	0.75	chr6	protein_coding	histone cluster 1, H2aj
ZNF519	ENSG00000175322.11	-0.75084	-0.222618	0.00599871	0.277289	0.2	0.16	0.23	0.12	0.07	0.17	chr18	protein_coding	zinc finger protein 519
RP11-65J21.3	ENSG00000262454.1	-0.876469	-0.752017	0.00672285	0.292411	0.81	1.29	0.91	0.52	0.45	0.67	chr16	lincRNA	--
HIST1H4C	ENSG00000197061.4	-2.25092	-0.781101	9.46225e-10	7.89955e-07	1.79	2	1.78	0.7	0.07	0.4	chr6	protein_coding	histone cluster 1, H4c
RP11-159D12.2	ENSG00000264112.1	-0.681925	1.22216	0.000272106	0.0425515	0.41	0.48	0.48	0.3	0.32	0.25	chr17	lincRNA	--
RP11-158I9.8	ENSG00000278376.1	-0.815671	-0.483348	0.00481355	0.245375	0.37	0.53	0.36	0.16	0.31	0.25	chr11	lincRNA	--
DDIT4	ENSG00000168209.4	-0.975425	7.17188	1.83966e-16	3.37885e-13	116.06	101.68	94.97	72.17	51.68	37.61	chr10	protein_coding	DNA-damage-inducible transcript 4
ZNF81	ENSG00000197779.13	-0.609062	0.883742	0.00223214	0.157627	0.25	0.25	0.25	0.18	0.15	0.18	chrX	protein_coding	zinc finger protein 81
FOXL2NB	ENSG00000206262.8	-4.87319	-3.04934	0.00209804	0.152765	0.04	0.01	0.04	0	0	0	chr3	protein_coding	FOXL2 neighbor
FNIP2	ENSG00000052795.12	-0.594354	0.393756	0.00859445	0.319107	0.27	0.12	0.23	0.14	0.13	0.14	chr4	protein_coding	folliculin interacting protein 2
INHBE	ENSG00000139269.2	-1.16562	1.29421	6.42143e-10	5.89701e-07	1.63	1.08	1.2	1.08	0.46	0.25	chr12	protein_coding	inhibin, beta E
RP5-1068E13.7	ENSG00000273148.1	-0.999193	-0.715736	0.00224282	0.157627	0.55	0.36	0.44	0.2	0.23	0.24	chr20	lincRNA	--
RP11-285G1.14	ENSG00000273363.1	-3.0835	-2.92852	0.0068247	0.292411	0.26	0.12	0.25	0.06	0	0	chr10	sense_intronic	--
EP300-AS1	ENSG00000231993.1	-4.74694	-3.11009	0.00209804	0.152765	0.23	0.35	0.1	0	0	0	chr22	antisense	EP300 antisense RNA 1
Metazoa_SRP	ENSG00000278771.1	-1.7187	-2.24873	0.00702041	0.295379	1.42	0.22	0.61	0.34	0	0.29	chr14	misc_RNA	--
LDB3	ENSG00000122367.19	-1.66885	-1.98632	0.00246418	0.168311	0.07	0.03	0.04	0.01	0	0.03	chr10	protein_coding	LIM domain binding 3
SNORD97	ENSG00000238622.1	-2.50621	-2.76554	0.00807308	0.309585	1.74	0	1.12	0	0	0.41	chr11	snoRNA	small nucleolar RNA, C/D box 97
OSMR-AS1	ENSG00000249740.1	-1.41618	-1.7871	0.00709621	0.295907	0.32	0.24	0.17	0.15	0.1	0.02	chr5	lincRNA	OSMR antisense RNA 1 (head to head)
TBC1D32	ENSG00000146350.13	-0.87183	-0.445484	0.00420987	0.228311	0.22	0.13	0.2	0.17	0.05	0.08	chr6	protein_coding	TBC1 domain family, member 32
HIST1H2AD	ENSG00000196866.2	-1.46004	-0.771818	2.25709e-05	0.00634517	1.44	1.72	2.2	0.78	0.98	0.29	chr6	protein_coding	histone cluster 1, H2ad
PRSS1	ENSG00000204983.12	-0.686348	0.205045	0.00435753	0.23356	1.26	1.27	1.09	0.83	0.91	0.54	chr7	protein_coding	protease, serine, 1 (trypsin 1)
BZRAP1	ENSG00000005379.15	-0.997995	-0.677983	0.00195381	0.148694	0.07	0.12	0.09	0.05	0.03	0.05	chr17	protein_coding	benzodiazepine receptor (peripheral) associated protein 1
KIF21B	ENSG00000116852.14	-0.588972	4.90316	1.64735e-06	0.000782491	4.03	3.24	3.07	2.81	2.37	1.8	chr1	protein_coding	kinesin family member 21B
CCDC114	ENSG00000105479.15	-2.49479	-2.44661	0.00103552	0.104436	0.04	0.04	0.09	0	0.01	0.02	chr19	protein_coding	coiled-coil domain containing 114
RP11-42O15.3	ENSG00000271992.1	-0.930079	-0.269095	0.00051612	0.0655663	3.11	1.94	1.37	1.09	1.11	1.06	chr1	lincRNA	--
CSTA	ENSG00000121552.3	-1.83277	-1.52997	6.96833e-05	0.0156572	0.36	0.23	0.32	0.1	0.05	0.11	chr3	protein_coding	cystatin A (stefin A)
HIST1H2BM	ENSG00000273703.1	-1.35774	-1.9264	0.00950287	0.331397	1.11	0.51	0.6	0.27	0.34	0.23	chr6	protein_coding	histone cluster 1, H2bm
EPHX3	ENSG00000105131.7	-2.56754	-2.40338	0.000605845	0.0716354	0.1	0.08	0.11	0.03	0	0.01	chr19	protein_coding	epoxide hydrolase 3
HIST1H1B	ENSG00000184357.4	-1.83853	0.436966	1.44049e-14	2.33444e-11	2.64	2.7	2.98	0.85	0.47	1.02	chr6	protein_coding	histone cluster 1, H1b
RP11-276E15.4	ENSG00000226609.1	-3.0893	-2.92554	0.00373319	0.213824	0.59	0.15	0.16	0.08	0	0	chr9	antisense	--
HIST1H2BE	ENSG00000274290.1	-1.73096	-0.642624	1.90115e-07	0.000130941	1.92	2.67	1.95	0.88	0.42	0.67	chr6	protein_coding	histone cluster 1, H2be
DEK	ENSG00000124795.14	-1.80822	6.28071	1.38782e-49	7.64686e-46	40.51	22.63	38.05	11.09	6.74	11.31	chr6	protein_coding	DEK proto-oncogene
CTD-2527I21.7	ENSG00000269303.1	-2.96868	-2.98391	0.0068247	0.292411	0.31	0.23	0.08	0.06	0	0	chr19	antisense	--
RP11-1055B8.1	ENSG00000279692.1	-0.894031	0.138081	0.000385325	0.052553	0.74	0.71	0.99	0.49	0.4	0.47	chr17	TEC	--
HIST1H2BG	ENSG00000273802.1	-1.12871	0.17876	5.29676e-06	0.00202675	1.58	2.93	2.11	0.97	0.87	1.2	chr6	protein_coding	histone cluster 1, H2bg
SNORD17	ENSG00000212232.1	-1.63745	-0.248825	2.45571e-08	1.8793e-05	3.72	3.54	6.25	2	1.36	1.22	chr20	snoRNA	small nucleolar RNA, C/D box 17
HIST1H3G	ENSG00000273983.1	-0.985378	0.152808	5.92338e-05	0.0141904	0.61	0.49	0.54	0.34	0.2	0.3	chr6	protein_coding	histone cluster 1, H3g
RP11-346C20.4	ENSG00000272250.1	-4.43656	-3.24833	0.00816945	0.309585	0	0.38	0.09	0	0	0	chr16	lincRNA	--
ROR1-AS1	ENSG00000223949.6	-2.40423	-2.81628	0.00807308	0.309585	0.05	0.03	0.03	0.01	0	0.01	chr1	antisense	ROR1 antisense RNA 1
HIST2H2AB	ENSG00000184270.4	-2.12319	-1.84586	6.99032e-05	0.0156572	0.9	0.74	0.87	0.26	0.08	0.22	chr1	protein_coding	histone cluster 2, H2ab
SLC4A4	ENSG00000080493.13	-1.16183	-1.18449	0.00419668	0.228044	0.04	0.06	0.07	0.03	0.02	0.03	chr4	protein_coding	solute carrier family 4 (sodium bicarbonate cotransporter), member 4
ECM2	ENSG00000106823.12	-1.14454	-0.583447	0.000231982	0.0385006	0.2	0.14	0.15	0.12	0.05	0.05	chr9	protein_coding	extracellular matrix protein 2, female organ and adipocyte specific
RP11-29A19.2	ENSG00000282390.1	-4.59978	-3.17768	0.00413682	0.225682	0	0.08	0.02	0	0	0	chr10	sense_intronic	--
RP11-43F13.3	ENSG00000215246.5	-0.722271	0.984108	0.000241114	0.0395399	0.84	0.44	0.68	0.43	0.35	0.42	chr5	antisense	--
KLF3-AS1	ENSG00000231160.9	-2.69352	-2.66646	0.00266295	0.173723	0.07	0.02	0.06	0	0	0.02	chr4	processed_transcript	KLF3 antisense RNA 1
PHEX	ENSG00000102174.8	-1.76281	-2.39842	0.00766096	0.308104	0.05	0.03	0.01	0.01	0.01	0.01	chrX	protein_coding	phosphate regulating endopeptidase homolog, X-linked
RP11-154J22.1	ENSG00000259488.2	-1.49139	-1.64471	0.00161629	0.138634	0.1	0.03	0.09	0.02	0.04	0.02	chr15	antisense	--
JDP2	ENSG00000140044.12	-0.613147	3.93574	1.95601e-06	0.000900435	3.07	3.03	3.01	2.3	1.92	1.83	chr14	protein_coding	Jun dimerization protein 2
STC2	ENSG00000113739.10	-1.06222	0.204546	1.00094e-05	0.0033629	0.3	0.27	0.23	0.18	0.1	0.1	chr5	protein_coding	stanniocalcin 2
RP11-173M1.5	ENSG00000265683.1	-1.30774	-1.95421	0.00950287	0.331397	0.34	0.53	0.25	0.23	0.09	0.12	chr17	processed_pseudogene	--
PIP5KL1	ENSG00000167103.11	-0.713221	-0.0553884	0.00611822	0.2802	0.39	0.55	0.42	0.33	0.27	0.23	chr9	protein_coding	phosphatidylinositol-4-phosphate 5-kinase-like 1
CTH	ENSG00000116761.11	-1.08076	3.66778	5.20517e-16	8.96266e-13	9.66	6.66	6.72	5.47	2.93	2.65	chr1	protein_coding	cystathionine gamma-lyase
HRASLS	ENSG00000127252.5	-2.69774	-2.66321	0.00151756	0.134433	0.2	0.15	0.11	0.03	0.03	0	chr3	protein_coding	HRAS-like suppressor
RP11-731C17.2	ENSG00000273486.1	-1.44956	-1.76787	0.00390175	0.219713	0.15	0.17	0.23	0.08	0.08	0.05	chr3	antisense	--
HIST1H2BN	ENSG00000233822.4	-1.98184	-0.63697	2.91001e-09	2.2906e-06	0.15	0.15	0.17	0.01	0.04	0.07	chr6	protein_coding	histone cluster 1, H2bn
DIO3OS	ENSG00000258498.6	-0.97074	-0.547664	0.00163335	0.138634	0.16	0.22	0.15	0.12	0.1	0.06	chr14	lincRNA	DIO3 opposite strand/antisense RNA (head to head)
RP11-196G18.24	ENSG00000272993.1	-0.699652	0.248276	0.00350029	0.206685	2.16	1.87	1.9	1.57	1.15	0.99	chr1	lincRNA	--
HRG	ENSG00000113905.4	-1.45682	-1.66471	0.00300102	0.187489	0.23	0.13	0.17	0.1	0.08	0.01	chr3	protein_coding	histidine-rich glycoprotein
RP11-421M1.8	ENSG00000272097.1	-1.1575	-1.30705	0.00566539	0.27077	0.31	0.26	0.33	0.16	0.15	0.1	chr6	lincRNA	--
RP1-198K11.5	ENSG00000275457.1	-0.752141	0.516067	0.000579982	0.0707013	1.63	1.69	1.68	0.87	1.02	1.1	chr20	antisense	--
SCARNA7	ENSG00000238741.1	-1.40564	-1.36361	0.000702235	0.0806107	1.71	1.07	1.31	0.41	0.49	0.61	chr3	scaRNA	small Cajal body-specific RNA 7
FP236383.5	ENSG00000275783.1	-1.26299	-0.905615	0.000396636	0.0535654	2.75	3.58	3.92	1.13	1.07	2.09	chr21	miRNA	--
MAGI1-IT1	ENSG00000272610.1	-2.1883	-2.61558	0.00501842	0.250146	0.1	0.05	0.04	0.03	0.01	0	chr3	sense_intronic	MAGI1 intronic transcript 1
CTD-3023L14.2	ENSG00000253130.1	-1.82458	-2.3644	0.00766096	0.308104	0.1	0.21	0.21	0.06	0	0.08	chr8	lincRNA	--
FP671120.7	ENSG00000278597.1	-6.37485	1.10998	5.29612e-72	1.45908e-67	4.32	5.26	198.06	0.69	1.31	0.59	chr21	miRNA	--
SNORD15B	ENSG00000207445.1	-1.67274	-1.1135	2.16171e-05	0.0061397	5.32	2.65	3.9	2.32	1.1	0.4	chr11	snoRNA	small nucleolar RNA, C/D box 15B
ATP8B2	ENSG00000143515.16	-1.31101	0.138789	1.04517e-07	7.57749e-05	0.35	0.19	0.15	0.12	0.1	0.06	chr1	protein_coding	ATPase, aminophospholipid transporter, class I, type 8B, member 2
HIST1H4D	ENSG00000277157.1	-1.86905	-1.13629	2.32459e-06	0.00103294	1.58	1.65	2.19	0.22	0.62	0.65	chr6	protein_coding	histone cluster 1, H4d
FP671120.4	ENSG00000275530.1	-1.69959	-0.967742	1.45251e-06	0.000702046	13.87	15.54	6.92	1.82	0	8.27	chr21	miRNA	--
RP11-725P16.2	ENSG00000272769.1	-0.639432	0.292937	0.00695802	0.295368	0.92	0.61	0.85	0.58	0.34	0.62	chr2	lincRNA	--
CTD-2008P7.1	ENSG00000260777.1	-1.78069	-2.21348	0.00450997	0.237571	0.18	0	0.07	0.02	0.02	0.02	chr17	lincRNA	--
RP1-228P16.1	ENSG00000240399.1	-1.24705	-1.61544	0.00529658	0.260573	0.54	0.5	0.35	0.22	0.17	0.19	chr12	transcribed_processed_pseudogene	--
RP11-545E17.3	ENSG00000223478.1	-0.634036	0.318679	0.00562833	0.27077	3.11	2.43	2.14	1.18	1.54	2.13	chr9	antisense	--
FAM3C	ENSG00000196937.10	-0.615494	4.16072	1.21389e-06	0.000608046	9.53	6.94	8.17	5.68	4.33	6.22	chr7	protein_coding	family with sequence similarity 3, member C
C4orf47	ENSG00000205129.8	-4.59462	-3.18033	0.00816945	0.309585	0.06	0.06	0.1	0	0	0	chr4	protein_coding	chromosome 4 open reading frame 47
MED15P9	ENSG00000223760.4	-1.05424	-0.718204	0.00152881	0.134996	0.24	0.33	0.34	0.23	0.11	0.12	chr2	transcribed_unprocessed_pseudogene	mediator complex subunit 15 pseudogene 9
HIST1H1E	ENSG00000168298.5	-2.56399	0.293264	4.1457e-21	9.51784e-18	2.41	2.74	3.21	0.77	0.39	0.31	chr6	protein_coding	histone cluster 1, H1e
PTCHD4	ENSG00000244694.7	-0.903697	-1.02514	0.0089395	0.324057	0.24	0.24	0.11	0.12	0.14	0.05	chr6	protein_coding	patched domain containing 4
AC002116.7	ENSG00000267698.1	-0.610975	0.358594	0.00679652	0.292411	2.36	2.51	1.77	2.06	0.85	1.44	chr19	antisense	--
RPEL1	ENSG00000235376.5	-4.60075	-3.17719	0.00413682	0.225682	0.12	0	0.02	0	0	0	chr10	protein_coding	ribulose-5-phosphate-3-epimerase-like 1
HIST1H3B	ENSG00000274267.1	-2.32554	-0.437601	1.40951e-12	2.04379e-09	3.09	2.12	2.55	0.5	0.78	0.28	chr6	protein_coding	histone cluster 1, H3b
SLC43A1	ENSG00000149150.8	-0.685958	2.34953	5.7903e-06	0.00215571	2.32	2.17	2.07	1.58	1.39	1.17	chr11	protein_coding	solute carrier family 43 (amino acid system L transporter), member 1
RP11-75C10.6	ENSG00000279801.1	-2.18955	-2.61617	0.00501842	0.250146	0.1	0.05	0.05	0	0.01	0.02	chr17	TEC	--
CASD1	ENSG00000127995.16	-0.752142	0.26039	0.0022194	0.157627	0.34	0.16	0.49	0.24	0.14	0.23	chr7	protein_coding	CAS1 domain containing 1
C11orf91	ENSG00000205177.6	-0.713348	-0.374621	0.00936267	0.329848	0.74	1.83	0.62	0.42	0.64	0.82	chr11	protein_coding	chromosome 11 open reading frame 91
CIDEB	ENSG00000136305.11	-1.00172	-0.637643	0.00170436	0.141229	0.17	0.26	0.31	0.13	0.1	0.15	chr14	protein_coding	cell death-inducing DFFA-like effector b
TAS2R15P	ENSG00000212125.2	-4.43712	-3.24805	0.00816945	0.309585	0.15	0.07	0.05	0	0	0	chr12	processed_pseudogene	taste receptor, type 2, member 15, pseudogene
IFNE	ENSG00000184995.7	-0.933205	0.247686	0.000182164	0.0321706	0.5	0.87	1.33	0.57	0.59	0.35	chr9	protein_coding	interferon, epsilon
HSD11B1	ENSG00000117594.9	-1.50362	-1.95709	0.00502319	0.250146	0.28	0.11	0.17	0.04	0.04	0.1	chr1	protein_coding	hydroxysteroid (11-beta) dehydrogenase 1
C1QTNF2	ENSG00000145861.7	-3.30228	-2.81641	0.00203478	0.151919	0	0.12	0.05	0	0.01	0	chr5	protein_coding	C1q and tumor necrosis factor related protein 2
SCARNA2	ENSG00000278249.1	-2.3369	-0.641162	2.43382e-11	2.79382e-08	2.52	2.3	1.79	0.57	0.31	0.41	chr1	scaRNA	small Cajal body-specific RNA 2
HIST1H3F	ENSG00000277775.1	-1.45019	-0.729236	1.48309e-05	0.00453991	2.23	1.33	1.88	1.4	0.16	0.49	chr6	protein_coding	histone cluster 1, H3f
RP11-658F2.8	ENSG00000258297.1	-0.805136	1.46966	5.38233e-06	0.00203128	1.63	1.12	1.45	0.93	0.65	0.85	chr11	antisense	--
RP11-715J22.6	ENSG00000260293.2	-1.00895	-1.11016	0.00631423	0.283355	0.12	0.08	0.08	0.05	0.05	0.03	chr16	sense_intronic	--
MTHFD2	ENSG00000065911.11	-0.713279	7.36208	1.39821e-09	1.13296e-06	53.5	34.53	43.48	32.45	23.29	25.33	chr2	protein_coding	methylenetetrahydrofolate dehydrogenase (NADP+ dependent) 2, methenyltetrahydrofolate cyclohydrolase
SNORA23	ENSG00000201998.1	-5.22014	-2.86784	0.000140953	0.0264167	1.16	1.06	0.25	0	0	0	chr11	snoRNA	small nucleolar RNA, H/ACA box 23
CTD-2006H14.2	ENSG00000271971.1	-0.950368	-0.783728	0.00550876	0.267194	0.86	0.66	1.05	0.55	0.31	0.51	chr8	antisense	--
RNU4-1	ENSG00000200795.1	-2.4173	0.894889	1.05943e-26	2.91874e-23	19.77	18.06	22.3	6.25	0.91	4.31	chr12	snRNA	RNA, U4 small nuclear 1
COX6B2	ENSG00000160471.12	-1.2494	-0.968153	0.000271167	0.0425515	0.16	0.35	0.13	0.04	0.09	0.13	chr19	protein_coding	cytochrome c oxidase subunit VIb polypeptide 2 (testis)
DYNC1I1	ENSG00000158560.14	-1.276	-1.597	0.00892817	0.324057	0.1	0.07	0.1	0.06	0.02	0.03	chr7	protein_coding	dynein, cytoplasmic 1, intermediate chain 1
PAGE1	ENSG00000068985.4	-2.17882	-2.62065	0.00838987	0.313624	0.05	0.24	0.34	0.05	0.1	0	chrX	protein_coding	P antigen family, member 1 (prostate associated)
LY75	ENSG00000054219.10	-1.97878	-2.48291	0.00503017	0.250146	0.03	0.03	0.02	0	0.01	0	chr2	protein_coding	lymphocyte antigen 75
AP001187.9	ENSG00000229719.3	-0.925978	-0.542678	0.00263945	0.173723	0.11	0.29	0.22	0.1	0.13	0.1	chr11	lincRNA	--
RNU5E-1	ENSG00000199347.1	-2.57116	-1.53973	5.4395e-07	0.000299716	2.06	2.69	5.7	0.28	0.27	1.21	chr1	snRNA	RNA, U5E small nuclear 1
NUPR1	ENSG00000176046.8	-1.25495	2.50026	1.01016e-16	1.98786e-13	1.53	1.6	0.97	0.65	0.65	0.43	chr16	protein_coding	nuclear protein, transcriptional regulator, 1
SCARNA6	ENSG00000251791.1	-2.96327	-2.98669	0.0068247	0.292411	0.67	0.12	0.43	0.13	0	0	chr2	scaRNA	small Cajal body-specific RNA 6
RP11-44F14.10	ENSG00000280027.1	-0.630024	0.625235	0.00314026	0.191812	1.4	1.07	1.23	0.95	0.65	0.81	chr16	TEC	--
ORM2	ENSG00000228278.3	-1.54548	-1.71358	0.00122358	0.115318	0.28	0.72	0.36	0	0.17	0.27	chr9	protein_coding	orosomucoid 2
HIST1H2BO	ENSG00000274641.1	-2.22791	-1.2603	2.2954e-07	0.000150567	0.83	1.44	1.85	0.18	0	0.68	chr6	protein_coding	histone cluster 1, H2bo
RN7SL652P	ENSG00000265559.2	-4.74111	-3.11309	0.00413682	0.225682	0	0.54	0.38	0	0	0	chr11	misc_RNA	RNA, 7SL, cytoplasmic 652, pseudogene
ASNS	ENSG00000070669.16	-0.749249	7.73955	1.85573e-10	1.8259e-07	120.69	97.63	89.63	74.77	59.77	51.06	chr7	protein_coding	asparagine synthetase (glutamine-hydrolyzing)
PYROXD1	ENSG00000121350.15	-0.674105	2.51334	5.00916e-06	0.00200003	1.8	1.15	1.32	1.01	0.69	0.98	chr12	protein_coding	pyridine nucleotide-disulphide oxidoreductase domain 1
OAZ3	ENSG00000143450.14	-0.685094	0.185279	0.00389274	0.219713	0.37	0.27	0.27	0.26	0.13	0.17	chr1	protein_coding	ornithine decarboxylase antizyme 3
CFAP45	ENSG00000213085.9	-0.673969	0.122776	0.00644648	0.286915	0.55	0.54	0.65	0.38	0.39	0.34	chr1	protein_coding	cilia and flagella associated protein 45
HIST1H4B	ENSG00000278705.1	-1.65845	-0.984661	1.87773e-05	0.00538868	1.05	0.96	2.08	0.7	0.29	0.4	chr6	protein_coding	histone cluster 1, H4b
SNORA74A	ENSG00000200959.1	-3.27685	-1.40135	1.09068e-10	1.1557e-07	1.96	4.23	2.07	0.34	0.16	0.29	chr5	snoRNA	small nucleolar RNA, H/ACA box 74A
PRR7-AS1	ENSG00000246334.2	-1.70906	-1.95922	0.00161118	0.138634	0.11	0.27	0.24	0.1	0.07	0.02	chr5	antisense	PRR7 antisense RNA 1
RP11-372B4.3	ENSG00000278356.1	-2.1874	-2.36534	0.00187	0.144929	0.31	0.35	0.6	0.22	0.07	0	chr12	sense_intronic	--
ZNF846	ENSG00000196605.7	-0.662725	1.00912	0.000645954	0.0757277	0.9	0.91	0.8	0.66	0.39	0.61	chr19	protein_coding	zinc finger protein 846
RNA5S9	ENSG00000201321.1	-2.28978	0.395359	8.53266e-19	1.80827e-15	11.86	10.3	24.7	3.7	2.71	3.65	chr1	rRNA	RNA, 5S ribosomal 9
RN7SL2	ENSG00000280102.2	-1.67494	2.47767	7.3362e-27	2.24569e-23	93.53	78.18	123.59	46.21	22.13	26.77	chr14	miRNA	RNA, 7SL, cytoplasmic 2
CEBPB-AS1	ENSG00000277449.1	-0.84312	-0.468013	0.00308393	0.190072	0.45	0.28	0.22	0.15	0.16	0.2	chr20	antisense	CEBPB antisense RNA 1
RP3-428L16.2	ENSG00000272841.1	-1.17647	-1.36374	0.00410084	0.225682	0.21	0.22	0.2	0.03	0.11	0.13	chr6	antisense	--
RP11-49I11.4	ENSG00000274849.1	-1.01374	-0.218825	0.00015736	0.0284299	3.62	1.65	1.73	1.28	0.57	1.48	chr18	sense_intronic	--
SPDYC	ENSG00000204710.2	-4.74667	-3.11024	0.00209804	0.152765	0.04	0.23	0.05	0	0	0	chr11	protein_coding	speedy/RINGO cell cycle regulator family member C
RP11-244F12.3	ENSG00000259498.1	-0.942693	-0.671369	0.00359841	0.210652	0.15	0.21	0.25	0.1	0.15	0.08	chr15	antisense	--
ANKRD36B	ENSG00000196912.12	-0.714095	1.11159	0.000214919	0.0370064	0.33	0.38	0.45	0.26	0.22	0.24	chr2	protein_coding	ankyrin repeat domain 36B
SPINK1	ENSG00000164266.10	-0.81069	0.0894417	0.00111471	0.108901	0.93	1.03	0.57	0.71	0.44	0.29	chr5	protein_coding	serine peptidase inhibitor, Kazal type 1
HTR2C	ENSG00000147246.9	-2.18127	-2.61966	0.00838987	0.313624	0.03	0.02	0.04	0.01	0	0.01	chrX	protein_coding	5-hydroxytryptamine (serotonin) receptor 2C, G protein-coupled
EFCAB7	ENSG00000203965.12	-0.662985	1.48467	0.000153668	0.0280369	1.42	1.18	1.51	0.91	0.7	1.03	chr1	protein_coding	EF-hand calcium binding domain 7
TERC	ENSG00000270141.3	-1.68817	-1.8459	0.000976191	0.101871	0.65	0.42	0.63	0.13	0.3	0.11	chr3	lincRNA	telomerase RNA component
RP11-977B10.2	ENSG00000258101.2	-1.34714	-1.55439	0.00457867	0.240271	0.15	0.27	0.33	0.14	0.09	0.08	chr12	antisense	--
RPPH1	ENSG00000259001.3	-2.16803	3.55104	3.08746e-53	2.12649e-49	22.74	24.66	37.1	5.53	4.29	9.16	chr14	antisense	ribonuclease P RNA component H1
EML6	ENSG00000214595.11	-0.597387	0.407726	0.00671132	0.292411	0.22	0.16	0.15	0.1	0.12	0.13	chr2	protein_coding	echinoderm microtubule associated protein like 6
CACTIN-AS1	ENSG00000226800.5	-2.6012	-2.71541	0.00464986	0.240796	0.09	0.03	0.1	0.02	0	0.02	chr19	antisense	CACTIN antisense RNA 1
MTUS2	ENSG00000132938.18	-2.51079	-2.76256	0.00464986	0.240796	0.03	0.02	0.01	0	0	0	chr13	protein_coding	microtubule associated tumor suppressor candidate 2
PSAT1	ENSG00000135069.13	-0.609864	7.99503	1.9567e-07	0.000131481	167.08	107.3	129.7	109.33	77.73	80.57	chr9	protein_coding	phosphoserine aminotransferase 1
RP11-331F4.5	ENSG00000280152.1	-1.44825	-0.686734	9.79185e-06	0.0033629	0.18	0.25	0.15	0.08	0.05	0.08	chr16	TEC	--
YPEL1	ENSG00000100027.14	-0.896228	0.486664	6.95246e-05	0.0156572	0.37	0.34	0.41	0.24	0.21	0.17	chr22	protein_coding	yippee-like 1 (Drosophila)
